# Supplementary material for: Comparative Transcriptome Analysis of Agrobacterium tumefaciens Reveals the Molecular Basis for the Recalcitrant Genetic Transformation of Camellia sinensis L
Source: MDPI journal article supplement (doi:10.3390/biom12050688), 2022-05-11
Supplement: s1 [file s1]

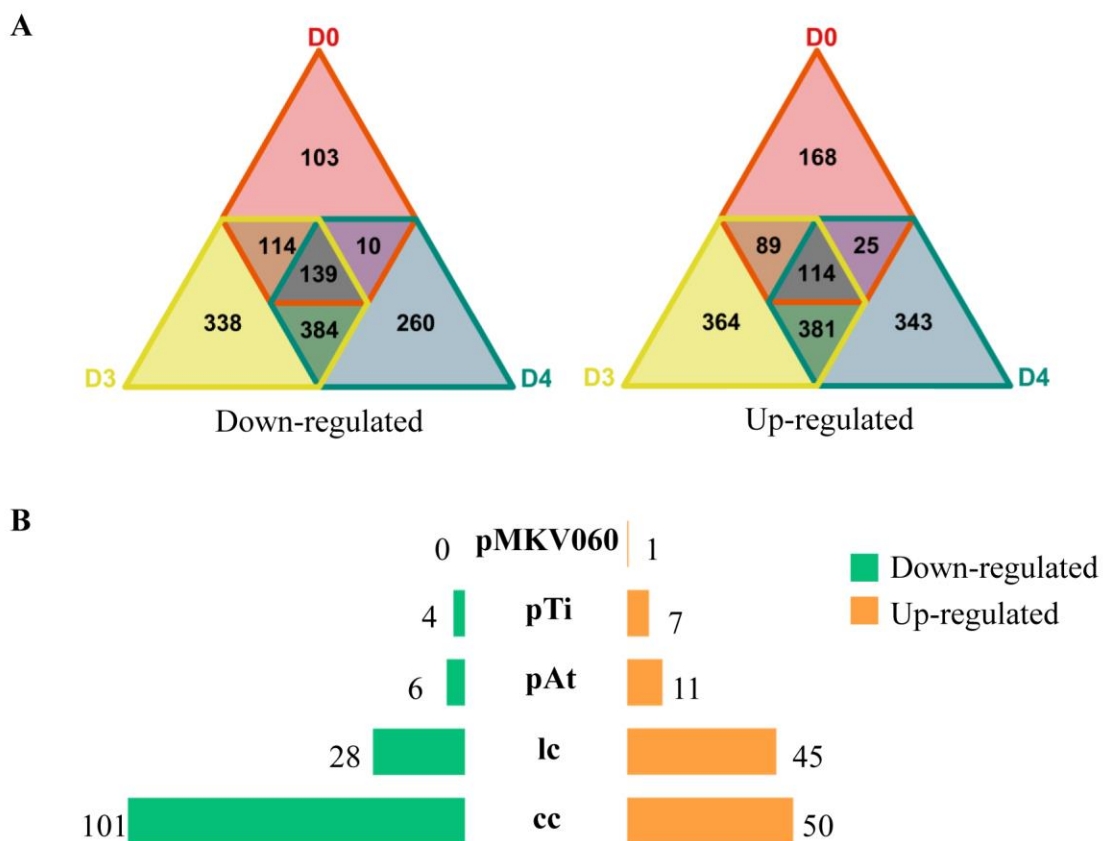

**Figure S2** Quantity and located replicons of differentially expressed genes (DEGs) in different comparisons. (A) Venn diagrams of *Agrobacterium* DEGs in *Agrobacterium*-tea groups compared to *Agrobacterium*-tobacco groups at different time points. (B) The located replicons of *Agrobacterium*-tea groups compared to *Agrobacterium*-tobacco groups at different time points. There are 5 replicons in *Agrobacterium* in this study: pMKV060: pMKV060 plasmid; Ti: tumor-inducing plasmid; At: At plasmid; lc: linear chromosome; cc: circular chromosome..
