# Supplementary material for: Comparative Transcriptome Analysis of Agrobacterium tumefaciens Reveals the Molecular Basis for the Recalcitrant Genetic Transformation of Camellia sinensis L
Source: MDPI journal article supplement (doi:10.3390/biom12050688), 2022-05-11
Supplement: s1 [file s1]

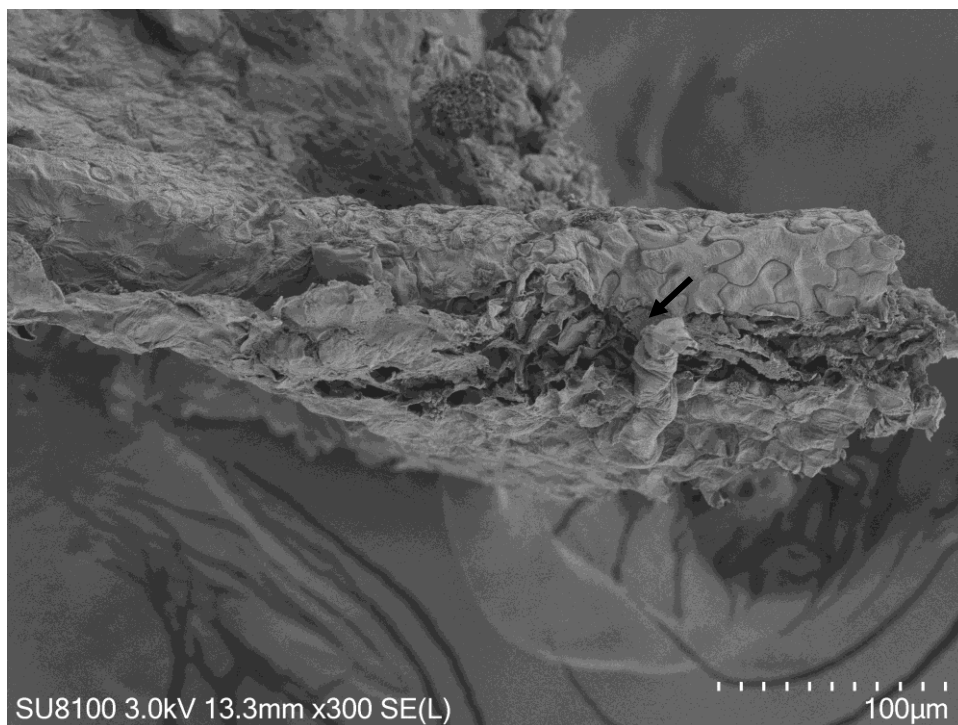

**B**

*Agrobacterium* on tea leaves

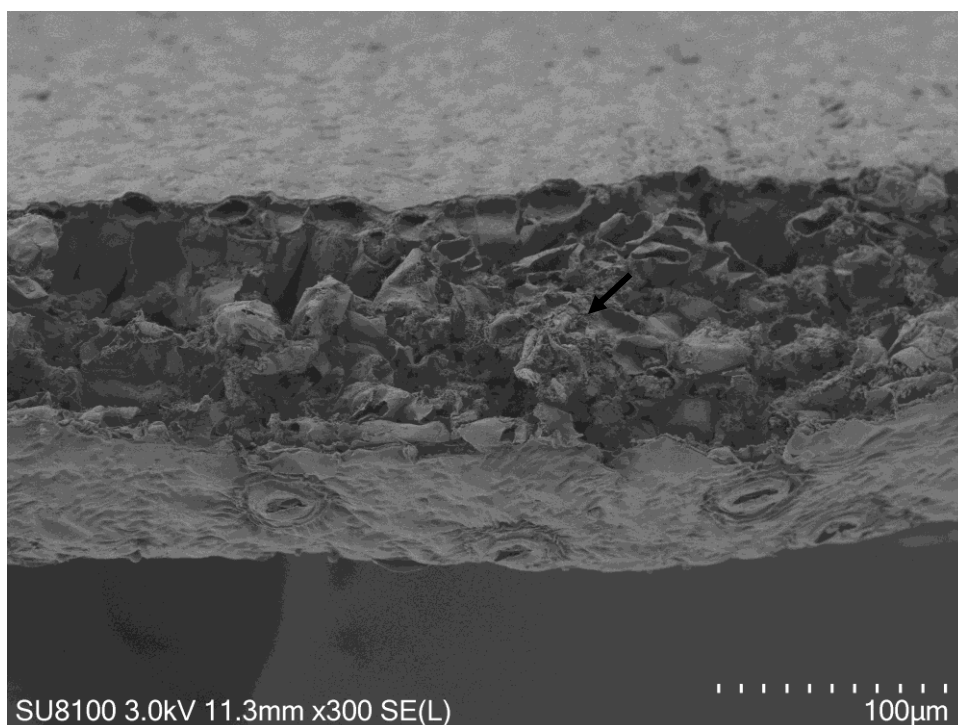

**Figure S1** Scanning electron microscopic observation of *Agrobacterium* GV3101 attached to the cross-sections of tobacco and tea leaves. Compared with tobacco, there were more bacteria attached to the cross-section of tea leaves. Solid black arrowheads point to bacterium clusters.
