# Supplementary material for: Comparative Transcriptome Analysis of Agrobacterium tumefaciens Reveals the Molecular Basis for the Recalcitrant Genetic Transformation of Camellia sinensis L
Source: MDPI journal article supplement (doi:10.3390/biom12050688), 2022-05-11
Supplement: s1 [file s1]

**Table S2** RNA-seq results of mapping rate of raw reads against the reference genome of *Agrobacterium fabrum* str. C58 plus the plasmid pMKV060.

| Samples | Total reads | Total mapped     | Multiple mapped | Uniquely mapped  |
|---------|-------------|------------------|-----------------|------------------|
| CD0_1   | 7316074     | 7005294 (95.75%) | 72788 (0.99%)   | 6932506 (94.76%) |
| CD0_2   | 7564976     | 7286516 (96.32%) | 70613 (0.93%)   | 7215903 (95.39%) |
| CD0_3   | 7996972     | 7749459 (96.9%)  | 71937 (0.9%)    | 7677522 (96.01%) |
| ND0_1   | 6765696     | 6708287 (99.15%) | 92217 (1.36%)   | 6616070 (97.79%) |
| ND0_2   | 6584706     | 6452072 (97.99%) | 80579 (1.22%)   | 6371493 (96.76%) |
| ND0_3   | 7069846     | 6947639 (98.27%) | 95893 (1.36%)   | 6851746 (96.92%) |
| CD3_1   | 7553458     | 7189164 (95.18%) | 67685 (0.9%)    | 7121479 (94.28%) |
| CD3_2   | 7388542     | 7237515 (97.96%) | 38633 (0.52%)   | 7198882 (97.43%) |
| CD3_3   | 7946468     | 7102322 (89.38%) | 60981 (0.77%)   | 7041341 (88.61%) |
| ND3_1   | 7731228     | 7618172 (98.54%) | 112901 (1.46%)  | 7505271 (97.08%) |
| ND3_2   | 8719236     | 8605288 (98.69%) | 165479 (1.9%)   | 8439809 (96.8%)  |
| CD4_1   | 7673658     | 7376618 (96.13%) | 60467 (0.79%)   | 7316151 (95.34%) |
| CD4_2   | 8258274     | 8120056 (98.33%) | 73970 (0.9%)    | 8046086 (97.43%) |
| CD4_3   | 7580880     | 7303322 (96.34%) | 49392 (0.65%)   | 7253930 (95.69%) |
| ND4_1   | 8962786     | 8874886 (99.02%) | 112808 (1.26%)  | 8762078 (97.76%) |
| ND4_2   | 7542930     | 7464069 (98.95%) | 121328 (1.61%)  | 7342741 (97.35%) |
| ND4_3   | 8861532     | 8746602 (98.7%)  | 111619 (1.26%)  | 8634983 (97.44%) |
