# Supplementary material for: Comparative Transcriptome Analysis of Agrobacterium tumefaciens Reveals the Molecular Basis for the Recalcitrant Genetic Transformation of Camellia sinensis L
Source: MDPI journal article supplement (doi:10.3390/biom12050688), 2022-05-11
Supplement: s1 [file s1]

**Table S1** Primers used in qRT-PCR reaction.

| Genes          | Forward primers (5'-3')  | Reverse primers (5'-3')   |
|----------------|--------------------------|---------------------------|
| <i>virE0</i>   | TGATGTTGATCGGACGGCTTTTCG | ACACAGTGAGGTTGTCGGTTTGC   |
| <i>virA</i>    | TGCTGGCACACAAATCTACGGATC | GGCGGTGGCGAGTTCAAGAAG     |
| <i>upp</i>     | GCTGGCAATGGTCTTCTGGAAGG  | GCCTCAAGCGTATCGTGGTCAC    |
| <i>flaB</i>    | AACTGGCTCGTCGGCGTCTC     | GAGGGCGTATTTTCGTGGTCGTAAC |
| <i>flaA</i>    | CGAAGAGTCCACCAAGCTGAAGG  | GCGGAAGAGCGACAGGATGTTT    |
| <i>ddpA</i>    | TTCCACTCCAACGACAAGTTCACG | GCGATATACTGGTTCCACGGGTTC  |
| <i>mcpV</i>    | AAGACGGGCGAATCCTTGAATACG | CCTGAATGCCGACCGACTGTTT    |
| <i>cheW2</i>   | AAGAGCACCGTCGCCAATGAAC   | TGCCGGGATCGTGAGGATGTC     |
| <i>cheW1</i>   | TGTCCAACGCCATCAAGCAATCC  | GTGTGCGGCATCGGGGTAAC      |
| <i>gyrB</i>    | CTCACCGACAAACGCCACTC     | GCCGCCGTCATACAGCAA        |
| <i>Atu8171</i> | TGGAAGAAGCGGAAATCA       | AGCGAAACGACGGAGC          |
| <i>dnaC</i>    | GTTCCGACCTTATCGTGCTG     | CGACGCCGCCATTCTT          |
