# Supplementary material for: Comparative Transcriptome Analysis of Agrobacterium tumefaciens Reveals the Molecular Basis for the Recalcitrant Genetic Transformation of Camellia sinensis L
Source: Biomolecules. 2022 May 11;12(5):688. doi: 10.3390/biom12050688 (PMC9138961; doi:10.3390/biom12050688)
Supplement: Supplementary file 1 [file biomolecules-12-00688-s001.zip]

Archive with 4 entries (4 files):
- biomolecules-1645209-supplementary.zip
- biomolecules-1645209-tex.zip
- biomolecules-1645209.pdf
- biomolecules-1645209.zip
