# Supplementary figures and images for: Comparative Transcriptome Analysis of Agrobacterium tumefaciens Reveals the Molecular Basis for the Recalcitrant Genetic Transformation of Camellia sinensis L
Source: MDPI journal article supplement (doi:10.3390/biom12050688), 2022-05-11

A

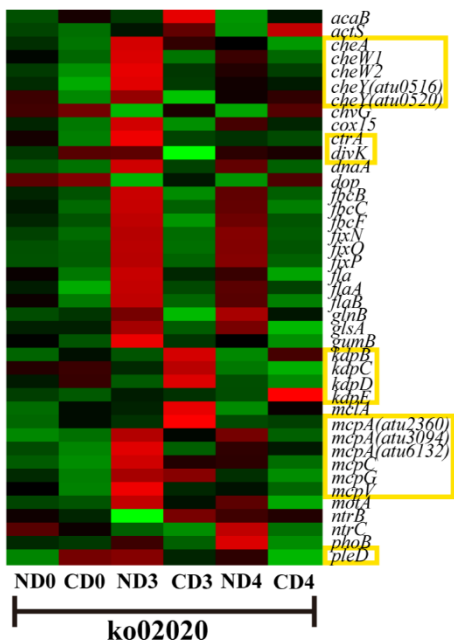

C

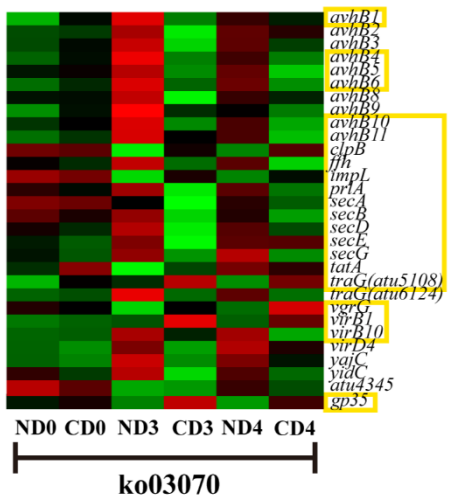

B

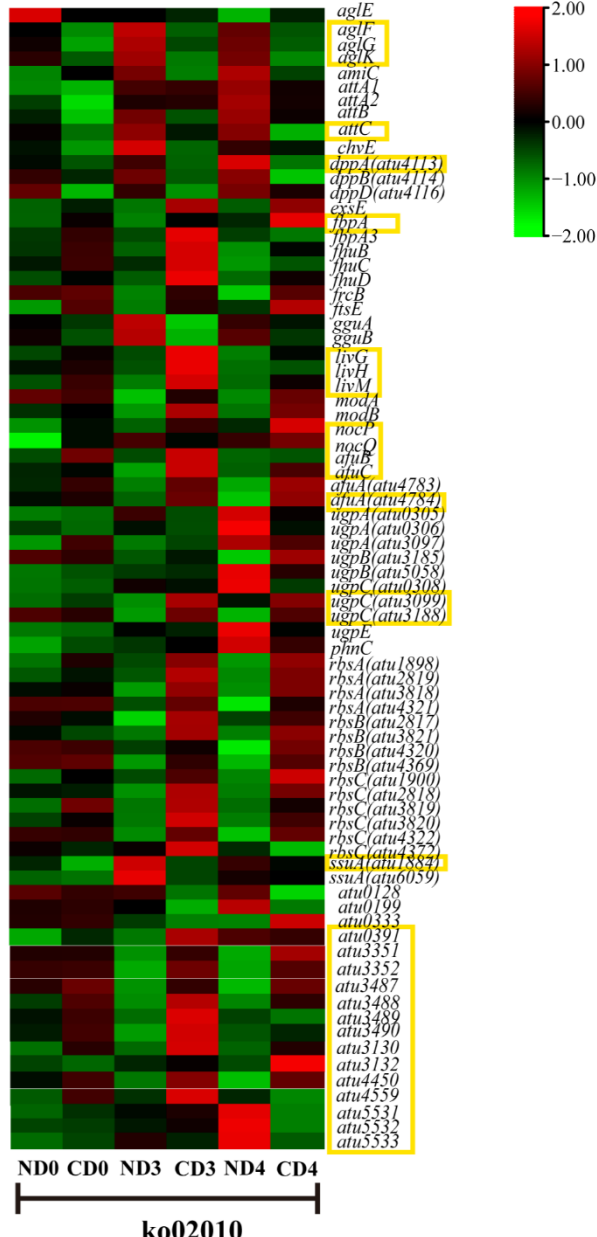

Supplement: s1 [file s1]

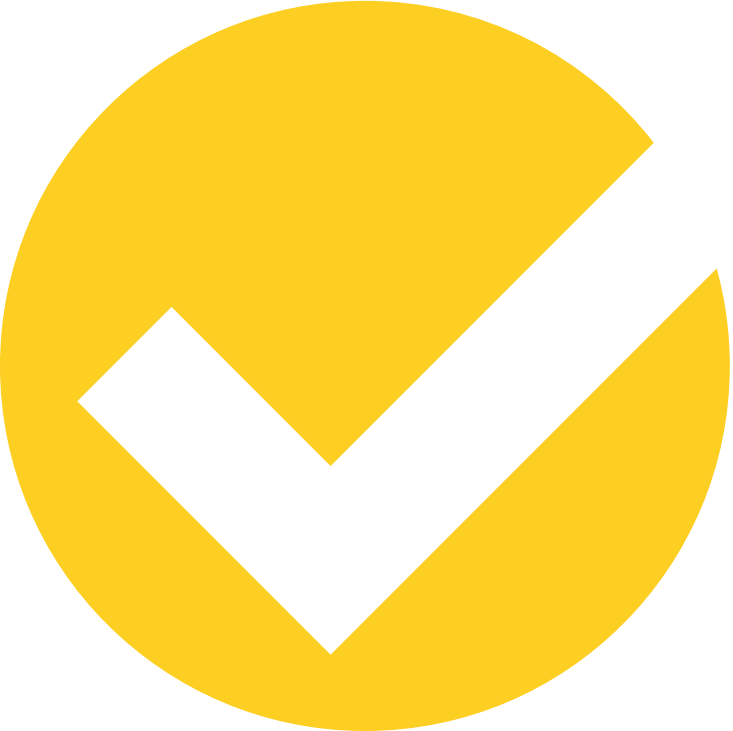

check for  
updates

Supplement: s1 [file s1]

**A**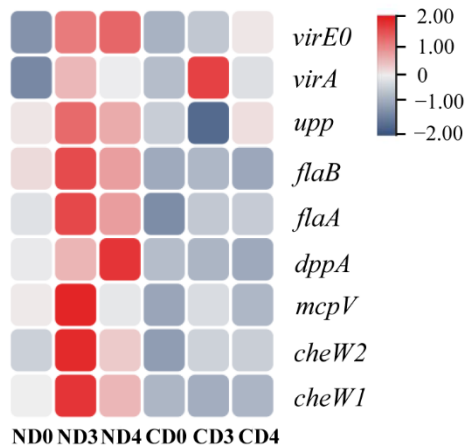**B**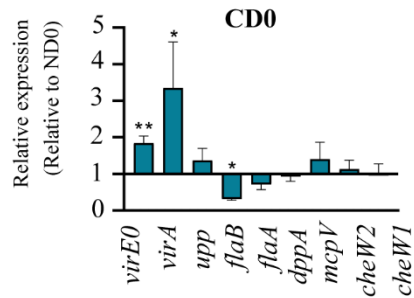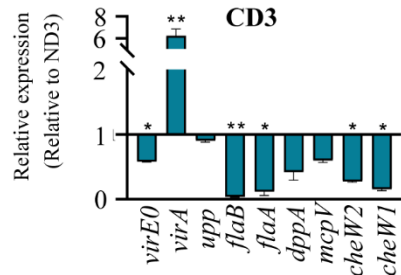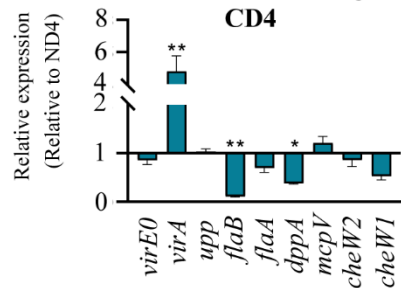**C**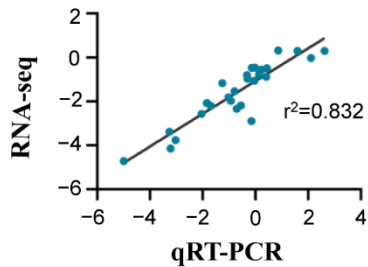

Supplement: s1 [file s1]

**A**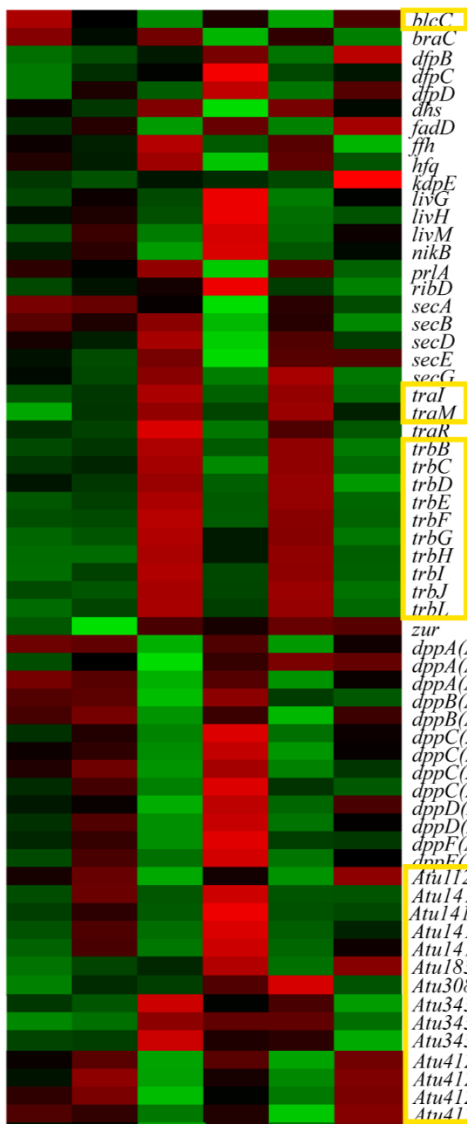

ND0 CD0 ND3 CD3 ND4 CD4

ko02024

**B**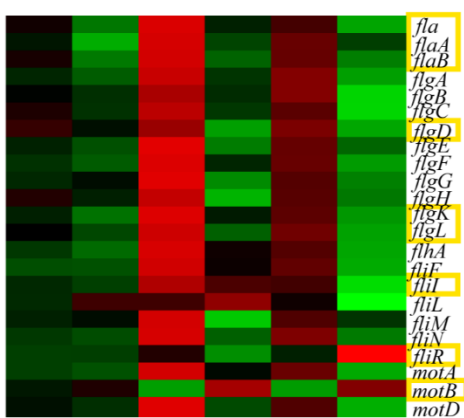

ND0 CD0 ND3 CD3 ND4 CD4

ko02040

**C**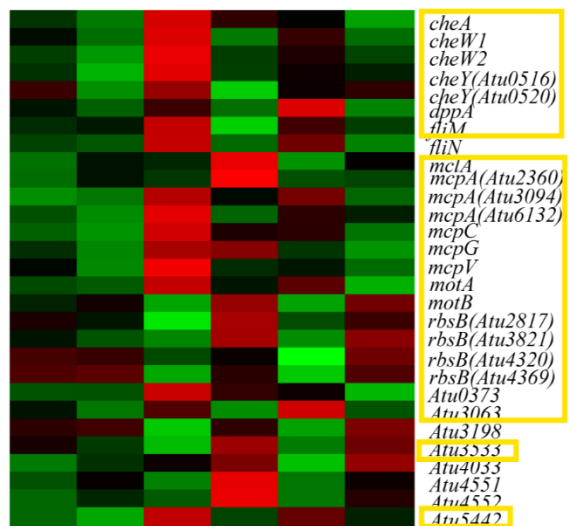

ND0 CD0 ND3 CD3 ND4 CD4

ko02030

Supplement: s1 [file s1]

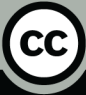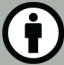

BY

Supplement: s1 [file s1]

**A**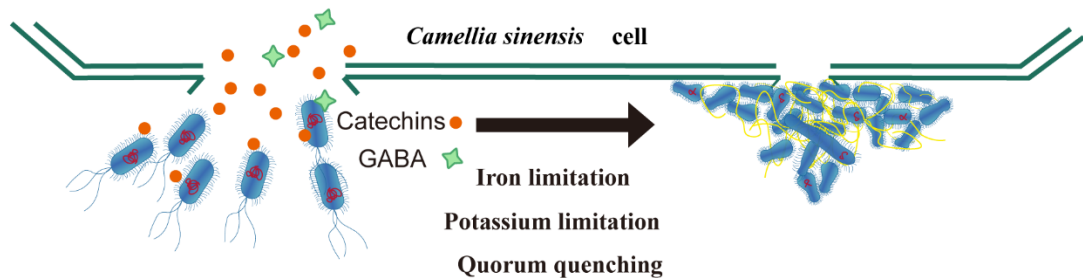**B**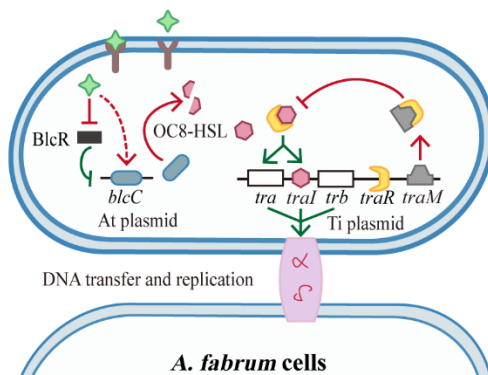

Supplement: s1 [file s1]

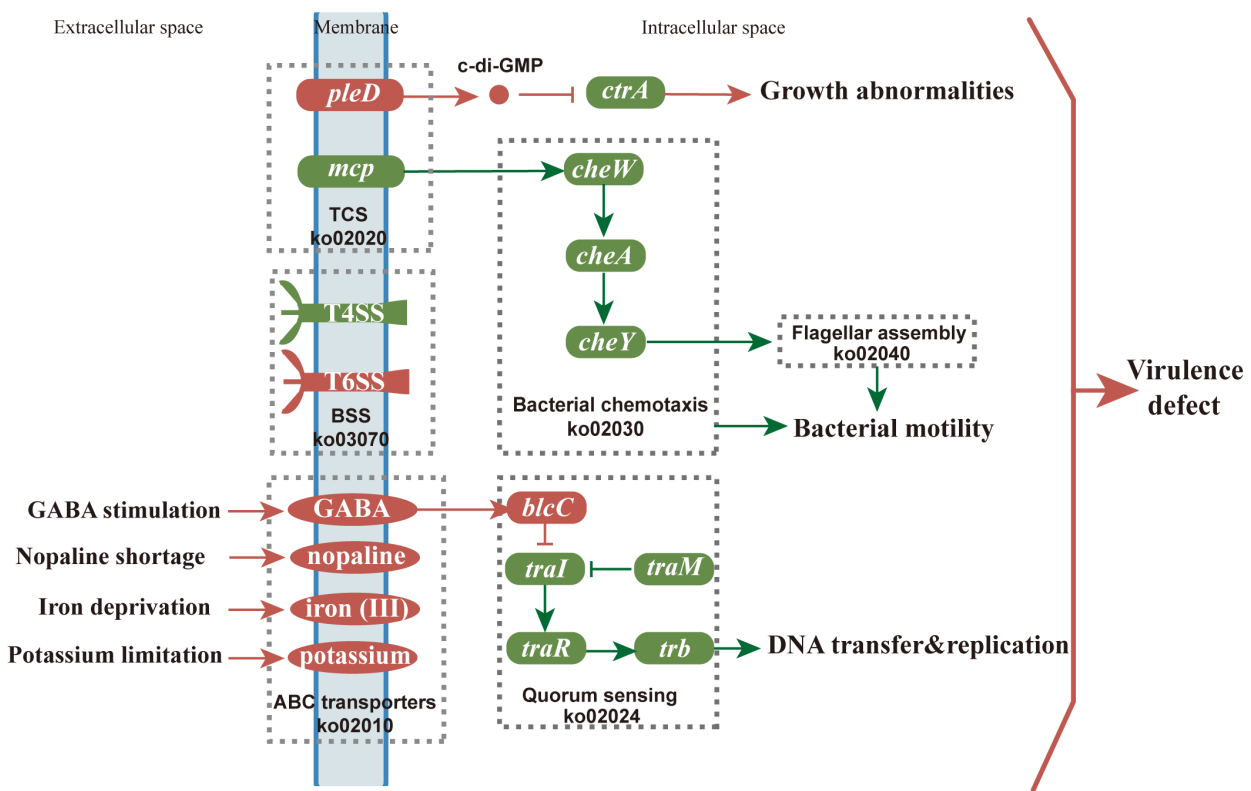

Supplement: s1 [file s1]

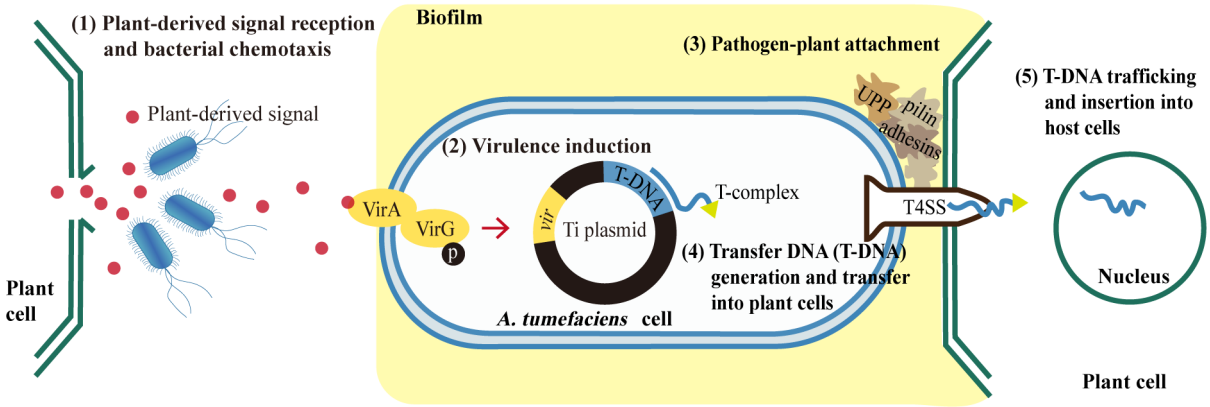

Supplement: s1 [file s1]

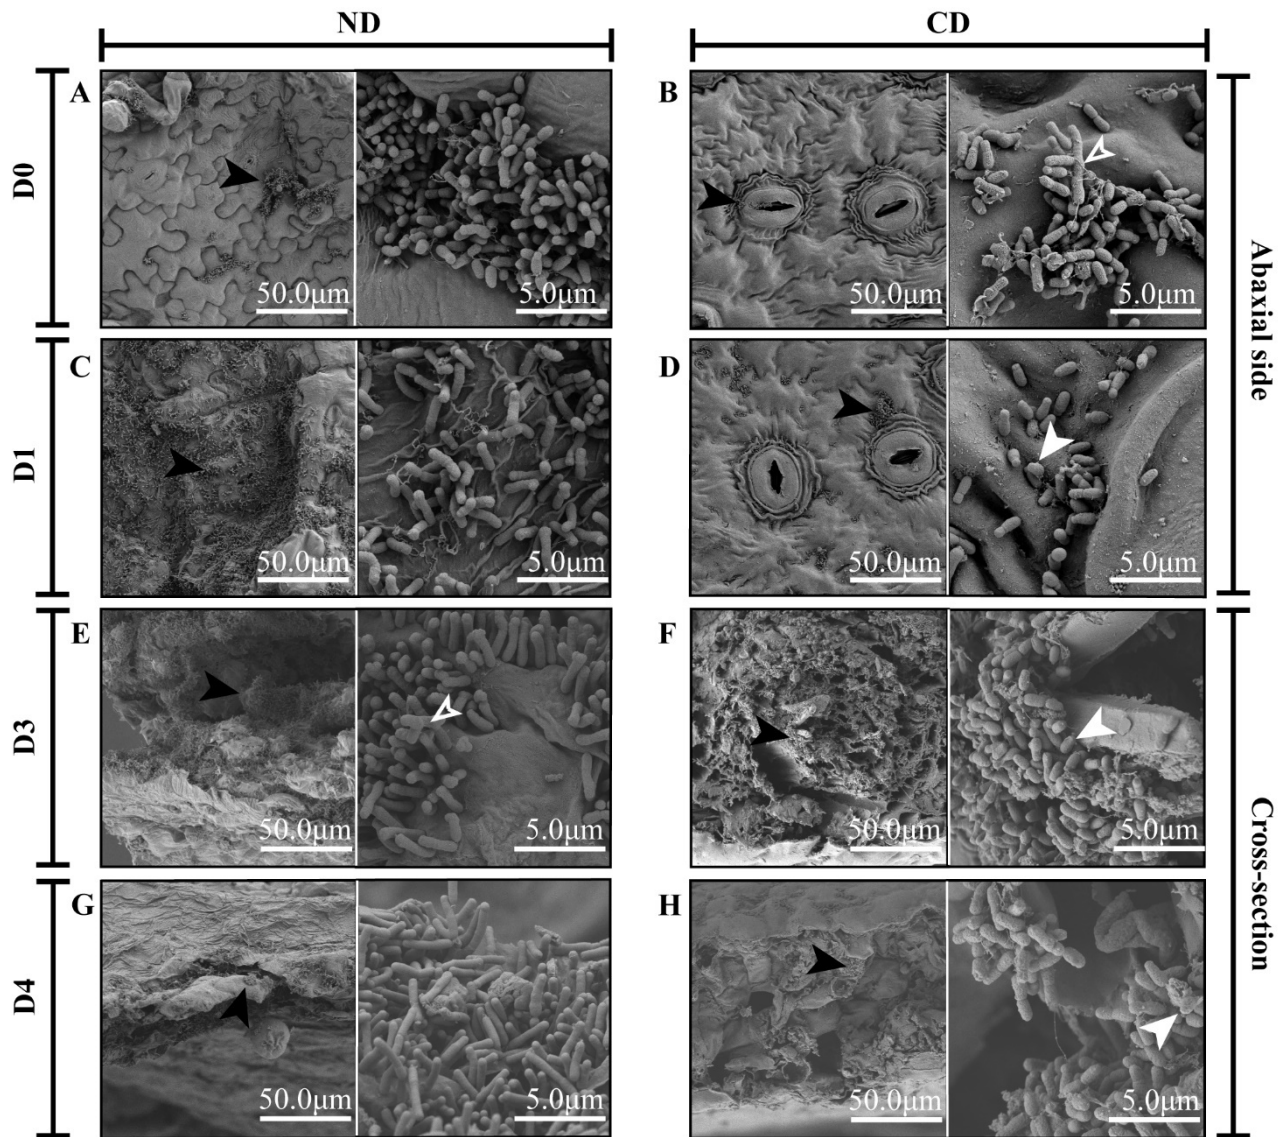

Supplement: s1 [file s1]

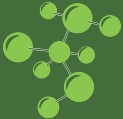

*biomolecules*

Supplement: s1 [file s1]
